# Supplementary material
Source: PubMed Central journal article supplement (PMC7399609)
Supplement: NIHMS1607112-supplement-Table_S1.pdf [file NIHMS1607112-supplement-Table_S1.pdf]

Table S1. qPCR Primers, Related to STAR Methods

| Gene           | Forward primer sequence  | Reverse primer sequence  |
|----------------|--------------------------|--------------------------|
| <i>Cyp11a1</i> | GGAGACATGGCCAAGATGGT     | ATGGGGTGGAGTCTCAGTGT     |
| <i>Hsd3b1</i>  | GCTGCACAGCCCTCCTAAG      | TCCATCCAGCCATGGTCAAC     |
| <i>Cyp21a1</i> | CTGCTTGGCCTCACTCAGAA     | GCACCACCACATCTTGCATC     |
| <i>Cyp11b1</i> | GCAGAGCTGGTAGCTGAGAG     | GGGGTTGATGTCGTGTCAGT     |
| <i>Nr3c1</i>   | AAAGAGCTAGGAAAAGCCATTGTC | TCAGCTAACATCTCTGGGAATTCA |
