# Supplementary material
Source: PubMed Central journal article supplement (PMC7399609)

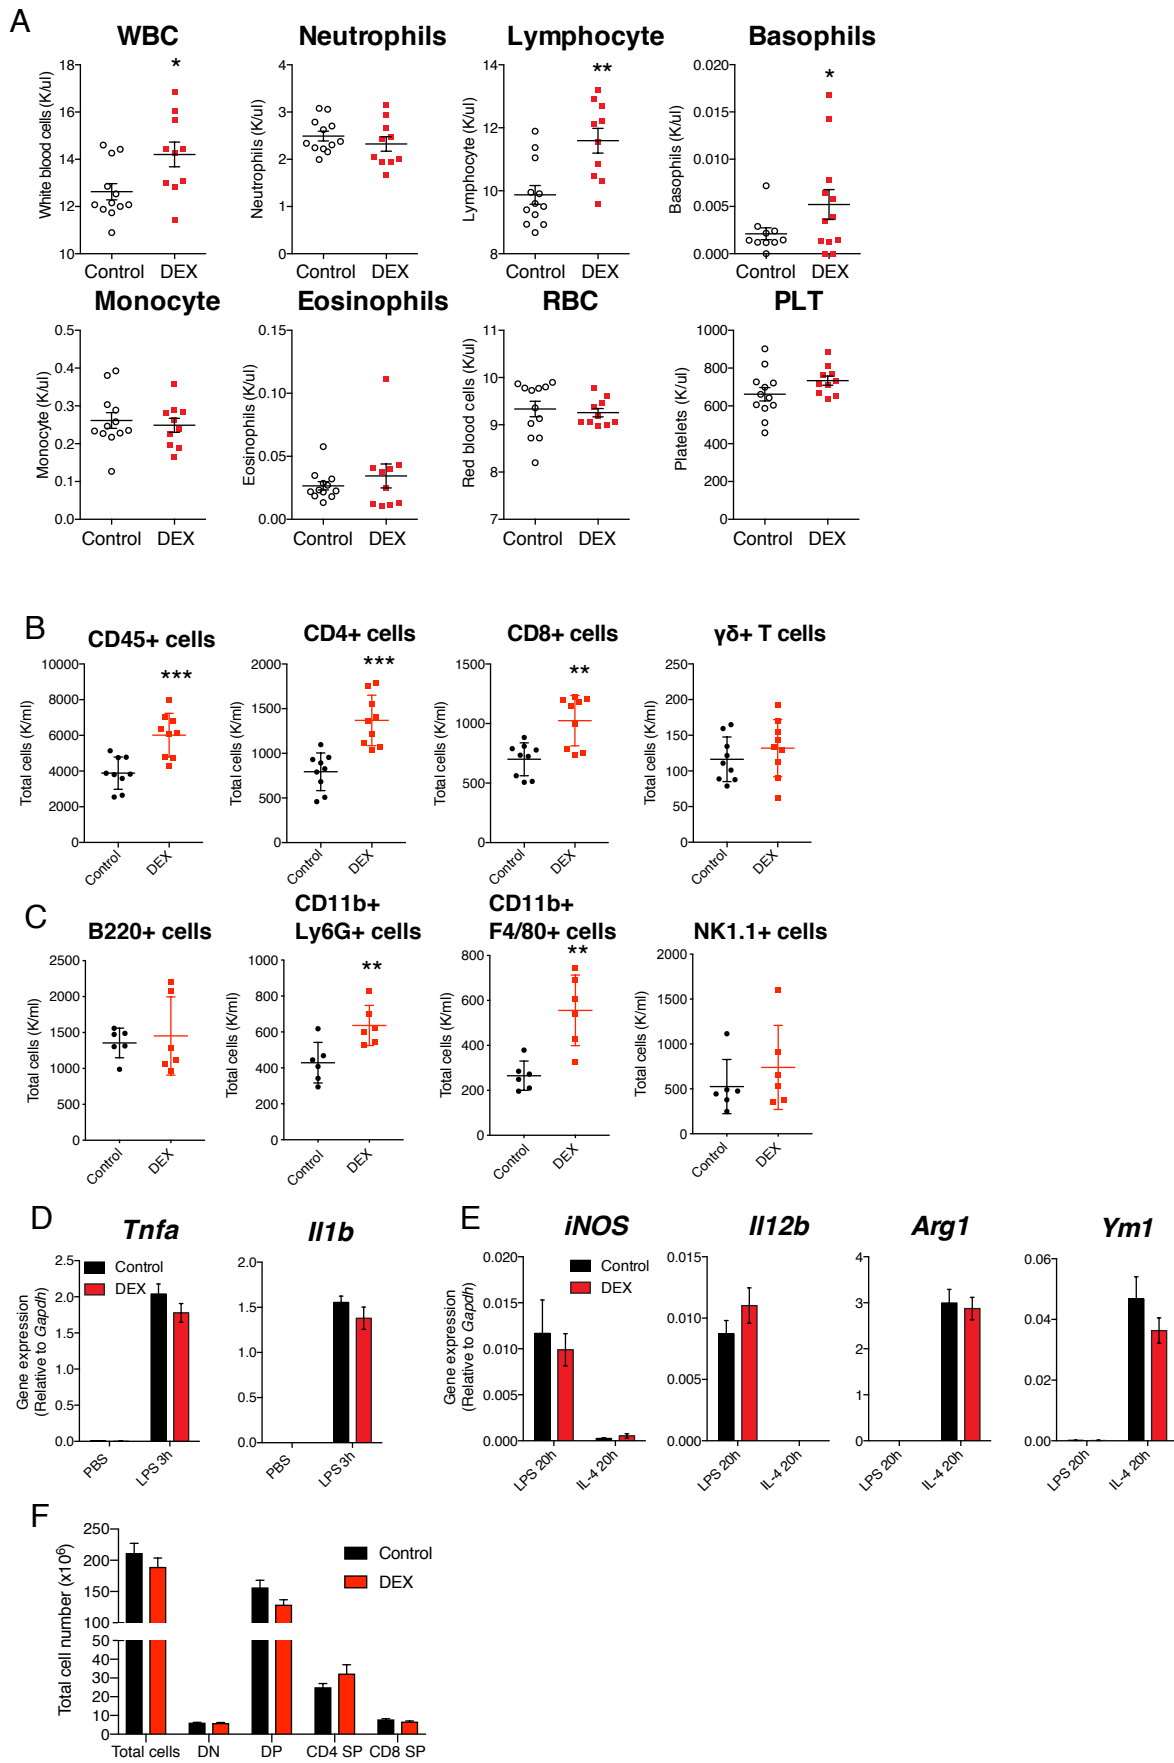

Figure S1

Supplement: NIHMS1607112-supplement-Figure_S1.pdf [file NIHMS1607112-supplement-Figure_S1.pdf]

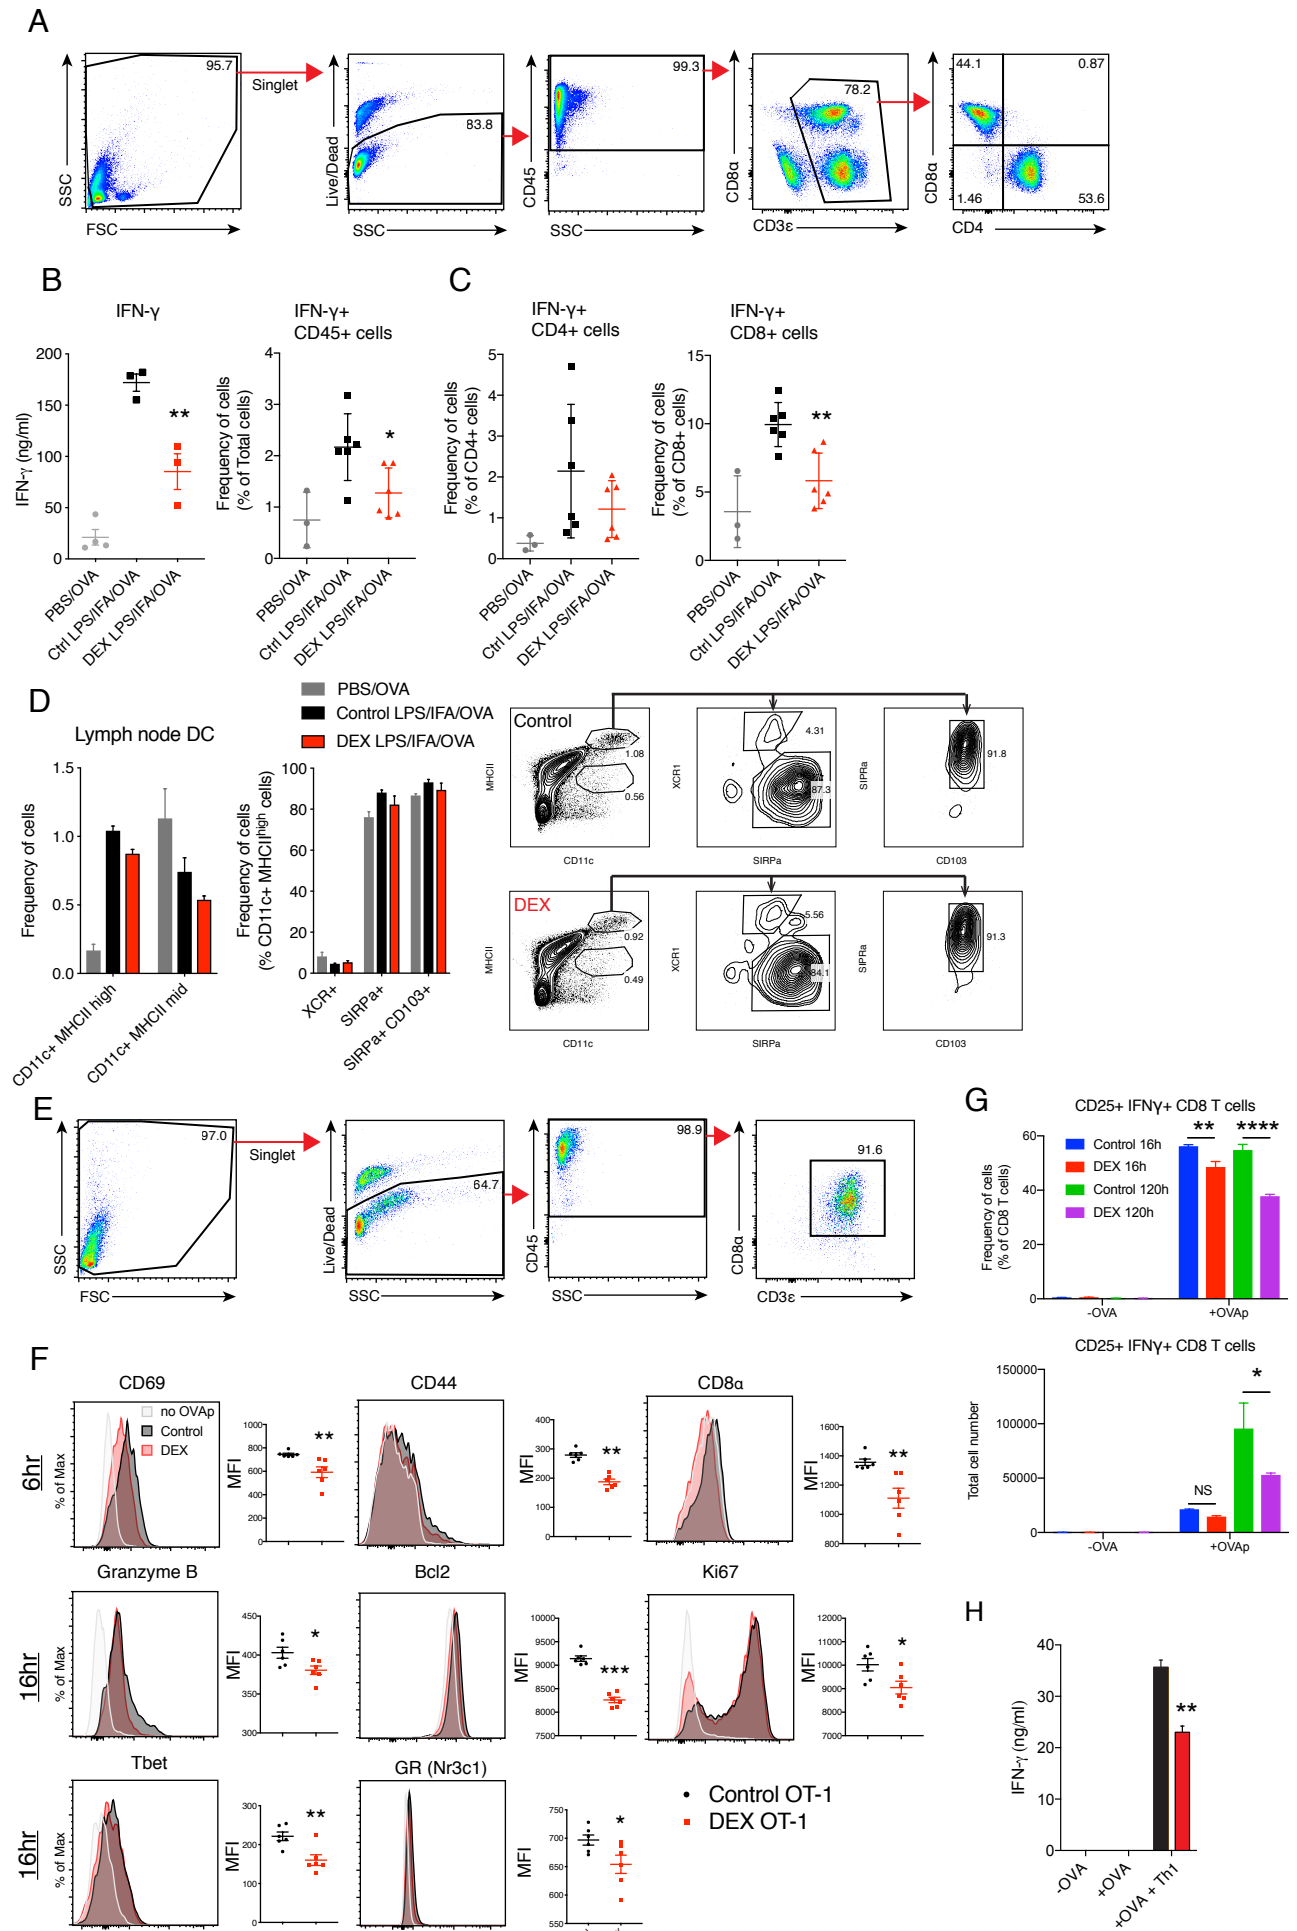

Figure S2

Supplement: NIHMS1607112-supplement-Figure_S2.pdf [file NIHMS1607112-supplement-Figure_S2.pdf]

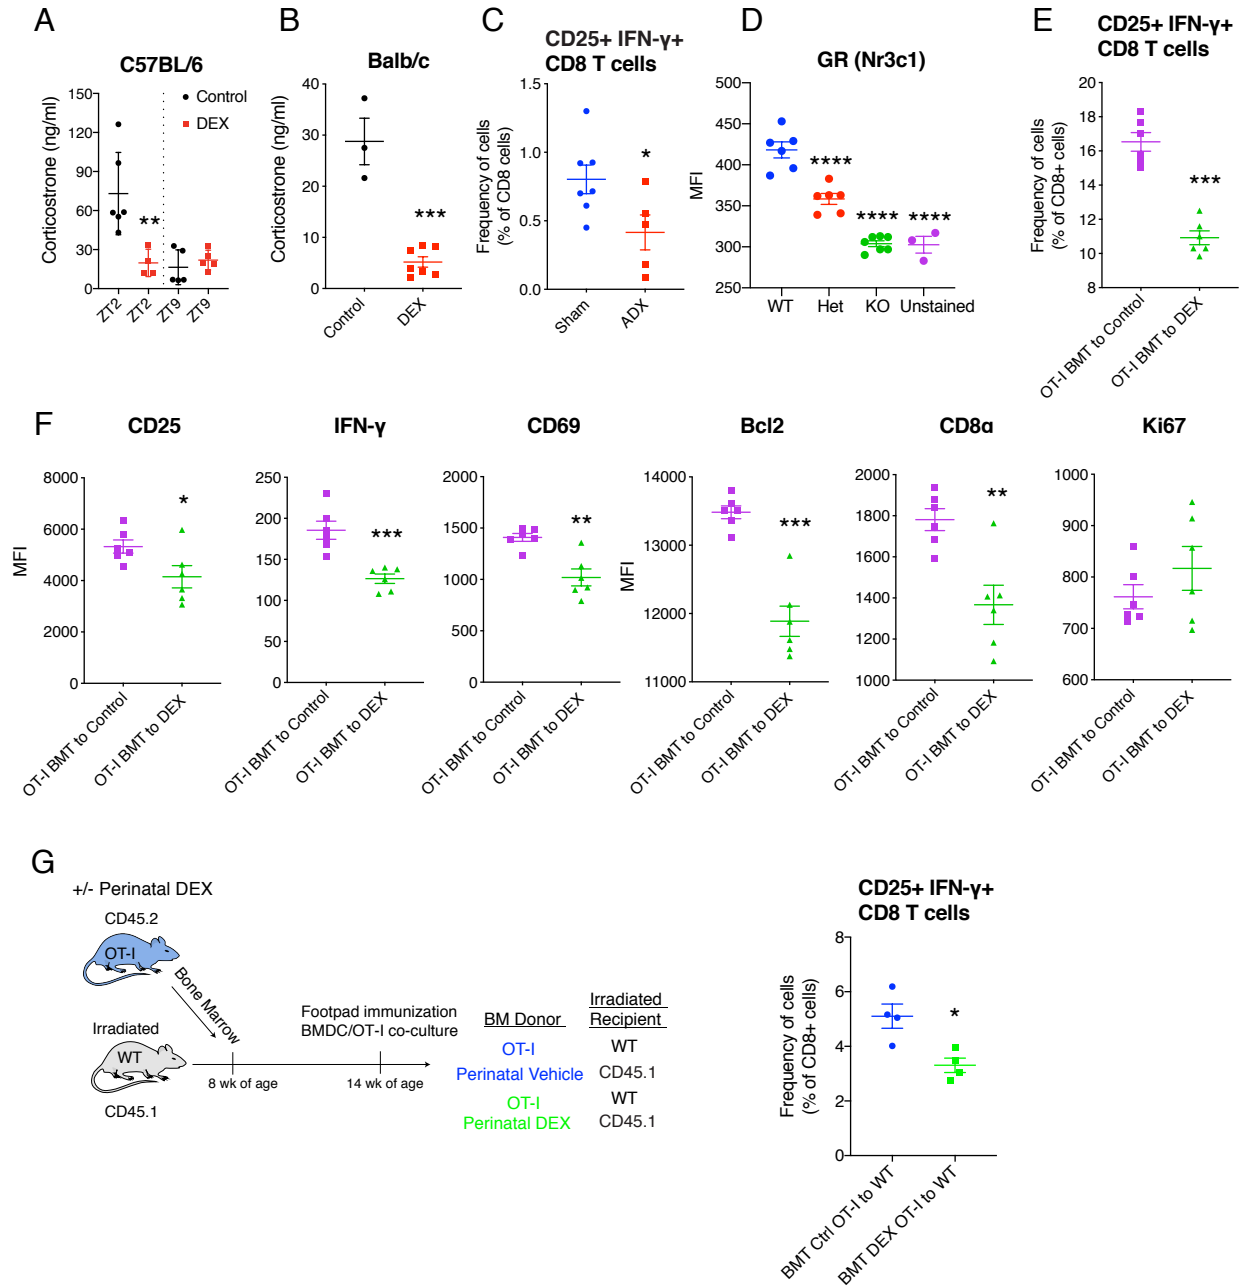

Figure S5

Supplement: NIHMS1607112-supplement-Figure_S5.pdf [file NIHMS1607112-supplement-Figure_S5.pdf]

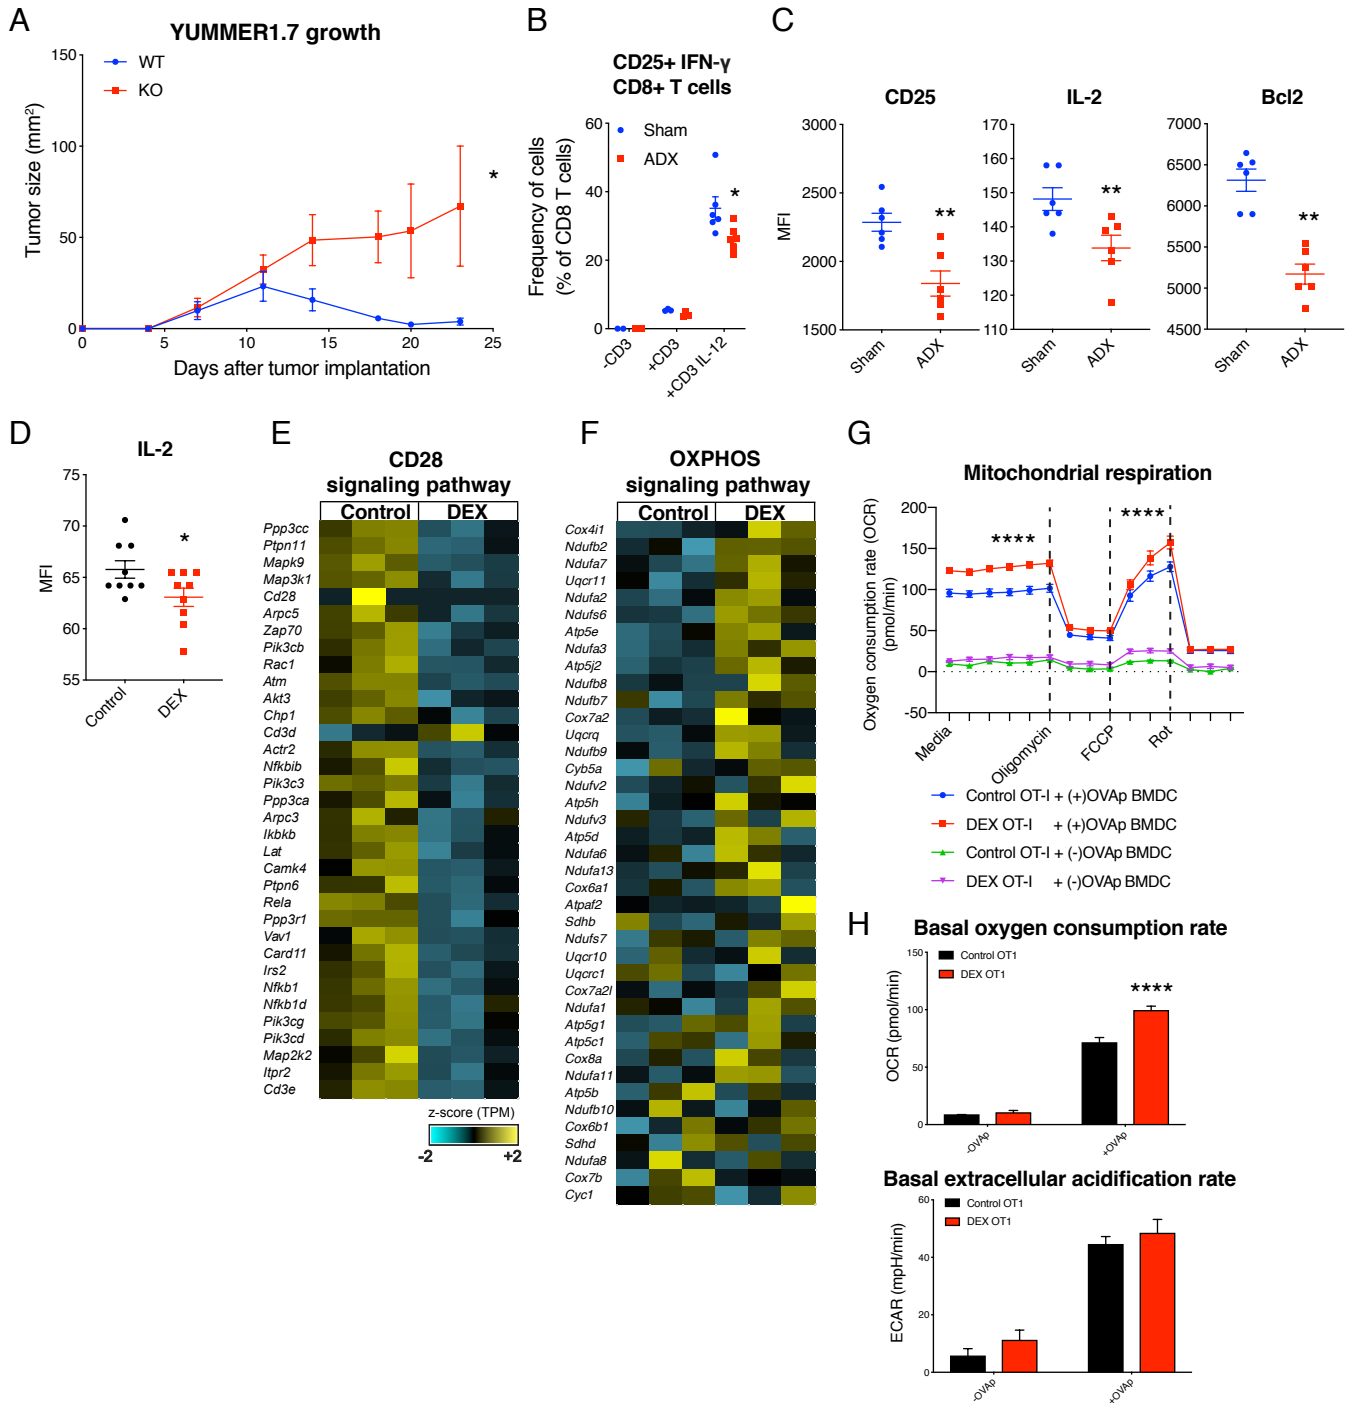

Figure S6

Supplement: NIHMS1607112-supplement-Figure_S6.pdf [file NIHMS1607112-supplement-Figure_S6.pdf]
